# Supplementary material for: Network Modeling for Post-Entry Management of Invasive Pest Species in the Philippines: The Case of the Colorado Potato Beetle, Leptinotarsa decemlineata (Say, 1824) (Coleoptera: Chrysomelidae)
Source: MDPI journal article supplement (doi:10.3390/insects14090731), 2023-08-29
Supplement: s1 [file s1]

## SUPPLEMENTARY MATERIAL

**Table S1. Flow rates and bases/references**

| Component                                                                                                                                                           | Interaction                        | Flow Rate | Explanation                                                                                                                                             | Basis/Reference          |
|---------------------------------------------------------------------------------------------------------------------------------------------------------------------|------------------------------------|-----------|---------------------------------------------------------------------------------------------------------------------------------------------------------|--------------------------|
| 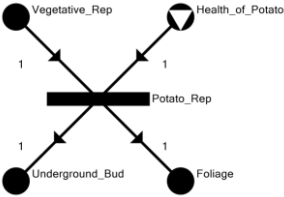 <p style="text-align: center;">Potato Reproduction</p>                            | Health_of_Potato → Potato_Rep      | 1.00      | Reproductive capacity of the potato plant is expected to be most highly influenced by its overall health.                                               | Assumed                  |
|                                                                                                                                                                     | Vegetative_Rep → Potato_Rep        | 1.00      | Maximal vegetative reproductive rate of the potato plant is expected to result to maximal reproduction of potato                                        | Assumed                  |
|                                                                                                                                                                     | Potato_Rep → Underground_Bud       | 1.00      | Reproduction in potato involves production of underground buds.                                                                                         | Assumed                  |
|                                                                                                                                                                     | Potato_Rep → Foliage               | 1.00      | Reproduction in potato involves maintenance of foliage.                                                                                                 | Assumed                  |
|  <p style="text-align: center;">Tuberization</p>                                   | Underground_Bud → Tuberization     | 1.00      | The underground bud undergoes tuberization to form tubers for vegetative reproduction.                                                                  | Assumed                  |
|                                                                                                                                                                     | Tuberization → Vegetative_Rep      | 1.00      | Maximal tuberization rate results to maximal vegetative reproductive rate of the potato plant.                                                          | Assumed                  |
|                                                                                                                                                                     | Tuberization → Tuber               | 1.00      | Maximal tuberization rate results to maximal consumable potato tuber production.                                                                        | Assumed                  |
|  <p style="text-align: center;"><i>Leptinotarsa decemlineata</i> Infestation</p> | L_decemlineata_Pop → Infestation   | 1.00      | Population establishment of <i>L. decemlineata</i> leads to infestation on the potato plant.                                                            | Assumed                  |
|                                                                                                                                                                     | Health_of_Potato → Infestation     | 0.80      | Maximum yield loss of 80% in potato can be caused by an infestation of <i>L. decemlineata</i> when control measures are not implemented.                | Maharijaya & Vosman [25] |
|                                                                                                                                                                     | Infestation → Level_of_infestation | 1.00      | The observable level of infestation of <i>L. decemlineata</i> on the potato plant is expected to be a function of the infestation capacity of the pest. | Assumed                  |

|                                                                                                                                           |                                  |      |                                                                                                                                                                                                                                                  |                                                                   |
|-------------------------------------------------------------------------------------------------------------------------------------------|----------------------------------|------|--------------------------------------------------------------------------------------------------------------------------------------------------------------------------------------------------------------------------------------------------|-------------------------------------------------------------------|
| 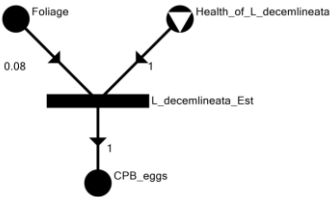 <p>Establishment of Invading <i>L. decemlineata</i></p> | Foliage →<br>L_decemlineata_Est  | 0.08 | Establishment of invading <i>L. decemlineata</i> is estimated to require at least 8 percent of the foliage of the potato plant, or about one-third of 25% which is the reported defoliation threshold that can be tolerated by the potato plant. | Varenhorst <i>et al.</i> [26]; Ragsdale & Radcliffe [27]; assumed |
|                                                                                                                                           | L_decemlineata_Est →<br>CPB_eggs | 1.00 | Oviposition would result from the establishment of the invading <i>L. decemlineata</i> .                                                                                                                                                         | Assumed                                                           |
|  <p>Hatching of CPB Eggs</p>                             | CPB_eggs →<br>Hatching           | 1.00 | <i>L. decemlineata</i> eggs will undergo hatching.                                                                                                                                                                                               | Assumed                                                           |
|                                                                                                                                           | Hatching →<br>CPB_larvae         | 1.00 | Hatching of the CPB eggs will produce larvae.                                                                                                                                                                                                    | Assumed                                                           |
|  <p>Pupation of CPB Larvae</p>                          | Foliage → Pupation               | 0.08 | Pupation of <i>L. decemlineata</i> larvae is estimated to require at least 8 percent of the foliage of the potato plant, or about one-third of 25% which is the reported defoliation threshold that can be tolerated by the potato plant.        | Varenhorst <i>et al.</i> [26]; Ragsdale & Radcliffe [27]; assumed |
|                                                                                                                                           | CPB_larvae →<br>Pupation         | 1.00 | CPB larvae will undergo pupation.                                                                                                                                                                                                                | Assumed                                                           |
|                                                                                                                                           | Pupation →<br>CPB_pupae          | 1.00 | Pupation of larvae will produce CPB pupae.                                                                                                                                                                                                       | Assumed                                                           |

|                                                                                                                                  |                                            |      |                                                                                                                                                                                                                                               |                                                                   |
|----------------------------------------------------------------------------------------------------------------------------------|--------------------------------------------|------|-----------------------------------------------------------------------------------------------------------------------------------------------------------------------------------------------------------------------------------------------|-------------------------------------------------------------------|
| 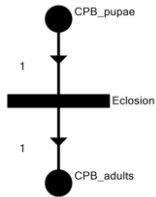 <p>Eclosion of CPB Pupae</p>                   | CPB_pupae →<br>Pupation                    | 1.00 | CPB pupae will undergo eclosion.                                                                                                                                                                                                              | Assumed                                                           |
|                                                                                                                                  | Pupation →<br>CPB_pupae                    | 1.00 | Eclosion of pupae will produce CPB adults.                                                                                                                                                                                                    | Assumed                                                           |
|  <p>Reproduction of CPB</p>                     | Foliage →<br>L_decemlineata_Rep            | 0.08 | Reproduction by <i>L. decemlineata</i> adults is estimated to require at least 8 percent of the foliage of the potato plant, or about one-third of 25% which is the reported defoliation threshold that can be tolerated by the potato plant. | Varenhorst <i>et al.</i> [26]; Ragsdale & Radcliffe [27]; assumed |
|                                                                                                                                  | CPB_adults →<br>L_decemlineata_Rep         | 1.00 | CPB adults will mate and reproduce.                                                                                                                                                                                                           | Assumed                                                           |
|                                                                                                                                  | L_decemlineata_Rep →<br>L_decemlineata_Pop | 1.00 | Maximal reproductive capacity of <i>L. decemlineata</i> leads to further population establishment of CPB on the host potato plant.                                                                                                            | Assumed                                                           |
|  <p>Reproduction of <i>Edovum puttleri</i></p> | CPB_eggs →<br>E_puttleri_Rep               | 0.90 | Average mortality of 90% in CPB egg masses resulting from parasitism or probing by <i>E. puttleri</i>                                                                                                                                         | Lashomb <i>et al.</i> [21]                                        |
|                                                                                                                                  | Health_of_E_puttleri →<br>E_puttleri_Rep   | 1.00 | Maximum reproductive capacity of <i>E. puttleri</i> would require healthy parasitoids that can effectively search for and parasitize CPB eggs                                                                                                 | Assumed                                                           |
|                                                                                                                                  | E_puttleri_Rep →<br>E_puttleri_Pop         | 1.00 | Maximal reproductive capacity of <i>E. puttleri</i> leads to population establishment on the CPB-infested potato plant.                                                                                                                       | Assumed                                                           |
|                                                                                                                                  | E_puttleri_Rep →<br>Control                | 1.00 | <i>E. puttleri</i> parasitism (reproduction) renders biological control of CPB.                                                                                                                                                               | Lashomb <i>et al.</i> [21]; assumed                               |

|                                                                                                                                  |                                            |       |                                                                                                                                                                                                                    |                                                                                            |
|----------------------------------------------------------------------------------------------------------------------------------|--------------------------------------------|-------|--------------------------------------------------------------------------------------------------------------------------------------------------------------------------------------------------------------------|--------------------------------------------------------------------------------------------|
| 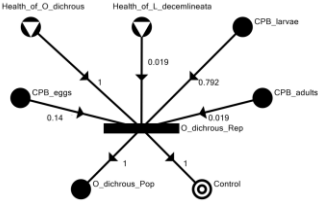 <p>Reproduction of <i>Oplomus dichrous</i></p> | CPB_eggs → O_dichrous_Rep                  | 0.14  | 95% overall CPB mortality x 14% CPB egg mortality resulting from the consumption by <i>O. dichrous</i> across developmental stages of the CPB                                                                      | Drummond <i>et al.</i> [22]; assumed                                                       |
|                                                                                                                                  | Health_of_O_dichrous → O_dichrous_Rep      | 1.00  | Maximum reproductive capacity of <i>O. dichrous</i> would require healthy bugs that can effectively search for and prey on CPB eggs, larvae, and adults.                                                           | Assumed                                                                                    |
|                                                                                                                                  | Health_of_L_decemli neata → O_dichrous_Rep | 0.019 | Consumption rate of <i>O. dichrous</i> on the invading adult CPB at 95% overall CPB mortality x 2% adult CPB mortality resulting from the consumption by <i>O. dichrous</i> across developmental stages of the CPB | Drummond <i>et al.</i> [22]; assumed                                                       |
|                                                                                                                                  | CPB_larvae → O_dichrous_Rep                | 0.792 | 95% overall CPB mortality x 83.4% larval mortality CPB resulting from the consumption by <i>O. dichrous</i> across developmental stages of the CPB                                                                 | Drummond <i>et al.</i> [22]; assumed                                                       |
|                                                                                                                                  | CPB_adults → O_dichrous_Rep                | 0.019 | 95% overall CPB mortality x 2% adult CPB mortality resulting from the consumption by <i>O. dichrous</i> across developmental stages of the CPB                                                                     | Drummond <i>et al.</i> [22]; assumed                                                       |
|                                                                                                                                  | O_dichrous_Rep → O_dichrous_Pop            | 1.00  | Maximal reproductive capacity of <i>O. dichrous</i> leads to population establishment on the CPB-infested potato plant.                                                                                            | Assumed                                                                                    |
|                                                                                                                                  | O_dichrous_Rep → Control                   | 1.00  | <i>O. dichrous</i> predation (reproduction) renders biological control of CPB.                                                                                                                                     | Drummond <i>et al.</i> [22]; assumed                                                       |
|  <p>Chemical Pest Control</p>                 | Pesticide → Chemical_Dosing                | 1.00  | Chemical insecticides, particularly neonicotinoids such as thiamethoxam, have been used for control of CPB.                                                                                                        | Scott <i>et al.</i> [23]                                                                   |
|                                                                                                                                  | Chemical_Dosing → Control                  | 1.00  | Neonicotinoid insecticide thiamethoxam renders population control of target and non-target insects.                                                                                                                | Assumed                                                                                    |
|                                                                                                                                  | Health_of_E_puttleri → Chemical_Dosing     | 0.99  | <i>E. puttleri</i> , a parasitic hymenopteran, would be most likely as highly susceptible to neonicotinoid toxicity similar to how it was for other parasitic wasps such as <i>Comperiella calauanica</i> .        | Almarinez <i>et al.</i> unpublished data on neonicotinoid toxicity in <i>C. calauanica</i> |

|  |                                                   |       |                                                                                                                                                                                                 |                           |
|--|---------------------------------------------------|-------|-------------------------------------------------------------------------------------------------------------------------------------------------------------------------------------------------|---------------------------|
|  | Health_of_O_dichrous<br>→ Chemical_Dosing         | 0.868 | <i>O. dichrous</i> could exhibit susceptibility to thiamethoxam toxicity as <i>Podisus nigrispinus</i> , another predatory pentatomid, when exposed to treated plants or fed with treated prey. | Torres <i>et al.</i> [24] |
|  | Health_of_L_decemli<br>neata → Chemical<br>Dosing | 0.77  | Mean thiamethoxam-induced mortality of CPB in 2011 in Canada                                                                                                                                    | Scott <i>et al.</i> [23]  |
